# Supplementary material for: Biosynthesis and Heterologous Expression of Cacaoidin, the First Member of the Lanthidin Family of RiPPs
Source: PubMed Central journal article supplement (PMC8068269; doi:10.3390/antibiotics10040403), 2021-04-08
Supplement: antibiotics-10-00403-s001.pdf [file antibiotics-10-00403-s001.pdf]

## Supplementary Materials

# Biosynthesis and Heterologous Expression of Cacaoidin, the First Member of The Lanthidin Family of Ripps

Fernando Román-Hurtado, Marina Sánchez-Hidalgo\*, Jesús Martín, Francisco Javier Ortiz-López and Olga Genilloud

Fundación MEDINA, Avenida del Conocimiento, 34, 18016 Granada, Spain; fernando.roman@medinaandalucia.es (F.R-H), jesus.martin@medinaandalucia.es (J.M), javier.ortiz@medinaandalucia.es (F.J.O-L), olga.genilloud@medinaandalucia.es (O.G)

\* Correspondence: marina.sanchez@medinaandalucia.es

## Tables

**Table S1.** Primers used for the cloning and checking of the *cao* biosynthetic gene cluster.

| Oligonucleotide | Sequence (5'-3')                                             |
|-----------------|--------------------------------------------------------------|
| Glyco1-sgRNA    | TAATACGACTCACTATAGGACGACTCACGTGTCAAAGAGTTTTAGAGCTAGAAATAGCAA |
| Glyco2-sgRNA    | TAATACGACTCACTATAGGGGCGAGATGCCATTCCAAGTTTTAGAGCTAGAAATAGCAA  |
| sgRNA-F         | GTTTTAGAGCTAGAAATAGCAAGTTAAAATAAGGCTAGTC                     |
| sgRNA-R         | AAAAGCACCGACTCGGTGCCACTTTTTCAAGTTGATAACGGACTAGCCTATTTAACT    |
| pCAP01-Glyco-F  | CGTGCGGTGGACCGCGCCGTGACCCCCTTGTCGAGACTTGAGGTACCTGT           |
| pCAP01-Glyco-R  | GGGCCGGTTCAGCCGGTGATGCCGTCTTTCGAGGTTACTAGTCGATCT             |
| cao4 check-F    | CGCGCACTGACCGTCTG                                            |
| cao4 check-R    | CTGCTGCCGGACTGACC                                            |
| cao8 check-F    | CCAACATCGACCCGGACC                                           |
| cao8 check-R    | GTCACGCCGCCACACTC                                            |
| cao15 check-F   | TGGGGCATCTGATCAAGGAG                                         |
| cao15 check-R   | TCGCGCAGTACCTCGGTT                                           |

**Table S2.** Closest HHPred homolog for each ORF in cacaoidin BGC. HHPred probabilities give the most relevant representation of significance with  $\geq 90\%$  usually being considered a true positive.

|               | Closest HHpred Homolog                                                                              | Probability | E-value |
|---------------|-----------------------------------------------------------------------------------------------------|-------------|---------|
| <i>caoR1</i>  | Response regulator protein VraR; <i>Enterococcus faecium</i> , LiaR, response regulator             | 99.96       | 1.5e-25 |
| <i>caoR2</i>  | Methylphosphonate synthase                                                                          | 98.06       | 0.00017 |
| <i>cao3</i>   | dTDP-4-dehydrorhamnose reductase, RfbD ortholog                                                     | 99.97       | 8e-28   |
| <i>cao4</i>   | O-methyltransferase family protein                                                                  | 100         | 6.2e-37 |
| <i>cao5</i>   | Adenosylhomocysteinase (E.C.3.3.1.1, 1.8.1.7)                                                       | 100         | 1.9e-37 |
| <i>cao6</i>   | Bifunctional protein Glm                                                                            | 100         | 7.8e-37 |
| <i>cao7</i>   | Type III effector HopA1                                                                             | 100         | 3.4e-39 |
| <i>cao8</i>   | Putative glycosyltransferase protein                                                                | 99.94       | 2.4e-25 |
| <i>cao9</i>   | 5-methylthioribose kinase (E.C.2.7.1.100)                                                           | 99.9        | 2.3e-21 |
| <i>caoA</i>   | Myocyte-specific enhancer factor 2A                                                                 | 25.67       | 67      |
| <i>cao11</i>  | Lipid A export ATP-binding/permease protein                                                         | 100         | 1.3e-89 |
| <i>cao12</i>  | Bacterial luciferase, 1,2-ethanediol; monooxygenase, flavoprotein                                   | 100         | 1e-41   |
| <i>caoD</i>   | MrsD protein                                                                                        | 100         | 7.5e-32 |
| <i>cao14</i>  | Spectinomycin phosphotransferase; protein kinase, aminoglycoside phosphotransferase, antibiotic;    | 99.76       | 5.4e-17 |
| <i>cao15</i>  | Insulinase family protein; Protease, M16 Family, Processing Protease                                | 100         | 3e-65   |
| <i>lcao16</i> | Glycosyltransferase                                                                                 | 99.95       | 3.5e-26 |
| <i>cao17</i>  | Light-harvesting protein B-875 alpha chain                                                          | 54.44       | 10      |
| <i>cao18</i>  | ABC transporter ATP-binding protein                                                                 | 100         | 2.5e-51 |
| <i>cao19</i>  | ATP-binding cassette sub-family G member                                                            | 99.93       | 7.2e-23 |
| <i>caoR3</i>  | Putative transposon-related DNA-binding protein                                                     | 99.56       | 8.8e-14 |
| <i>cao21</i>  | Ubiquinol-cytochrome c reductase iron-sulfur subunit                                                | 59.39       | 56      |
| <i>caoR4</i>  | TRANSCRIPTIONAL REGULATORY PROTEIN (PROBABLY TETR-FAMILY); tetR family of transcriptional regulator | 99.94       | 3.3e-24 |
| <i>cao23</i>  | Conserved protein; Structural genomics, unknown function, ligand;                                   | 99.89       | 7.2e-20 |
| <i>cao24</i>  | Glycosyl transferase (E.C.2.4.1.57)                                                                 | 100         | 5.8e-38 |
| <i>cao25</i>  | TarM; Glycosyltransferase, GT-A, Wall teichoic acid                                                 | 97.73       | 0.0025  |
| <i>cao26</i>  | ABC transporter ATP-binding protein (E.C.3.6.3.-)                                                   | 87.92       | 1.5     |
| <i>caoR5</i>  | Tetratricopeptide repeat sensor PH0952                                                              | 100         | 1.2e-36 |



Figures

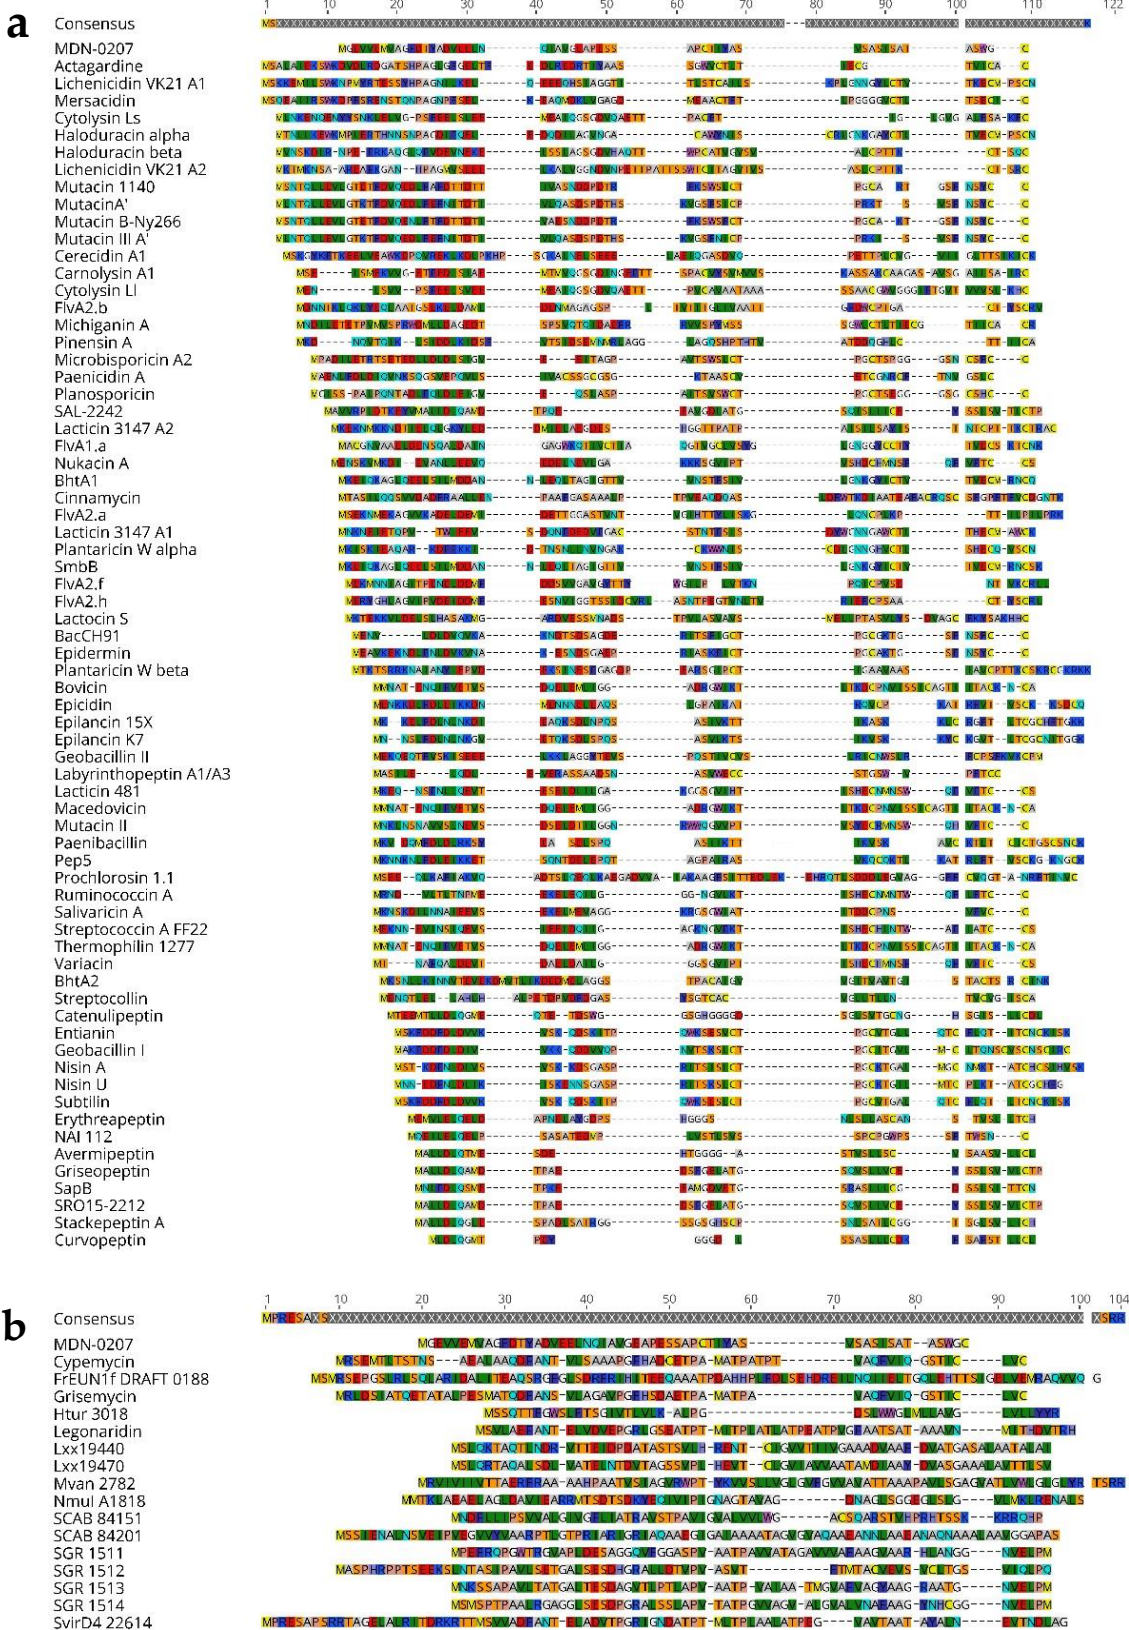

**Figure S1.** Alignment of the structural amino acid sequence (leader peptide + core) of cacaoidin (MDN-0207) with the sequences of other already known lanthipeptides (a) and linaridins (b).

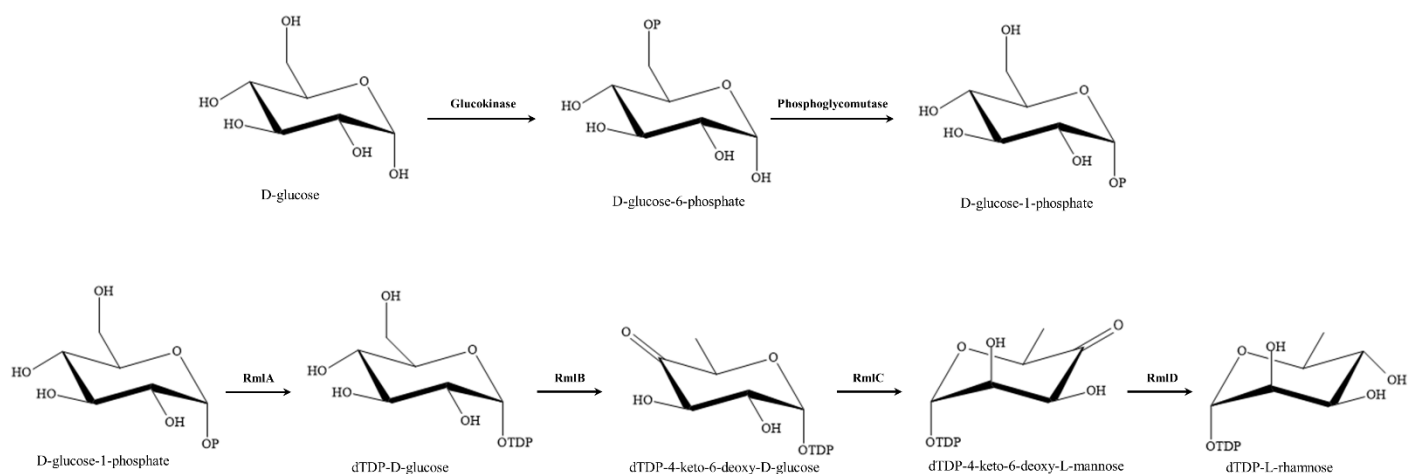

**Figure S2.** Schematic representation of the biosynthesis of dTDP-L-rhamnose from D-glucose.

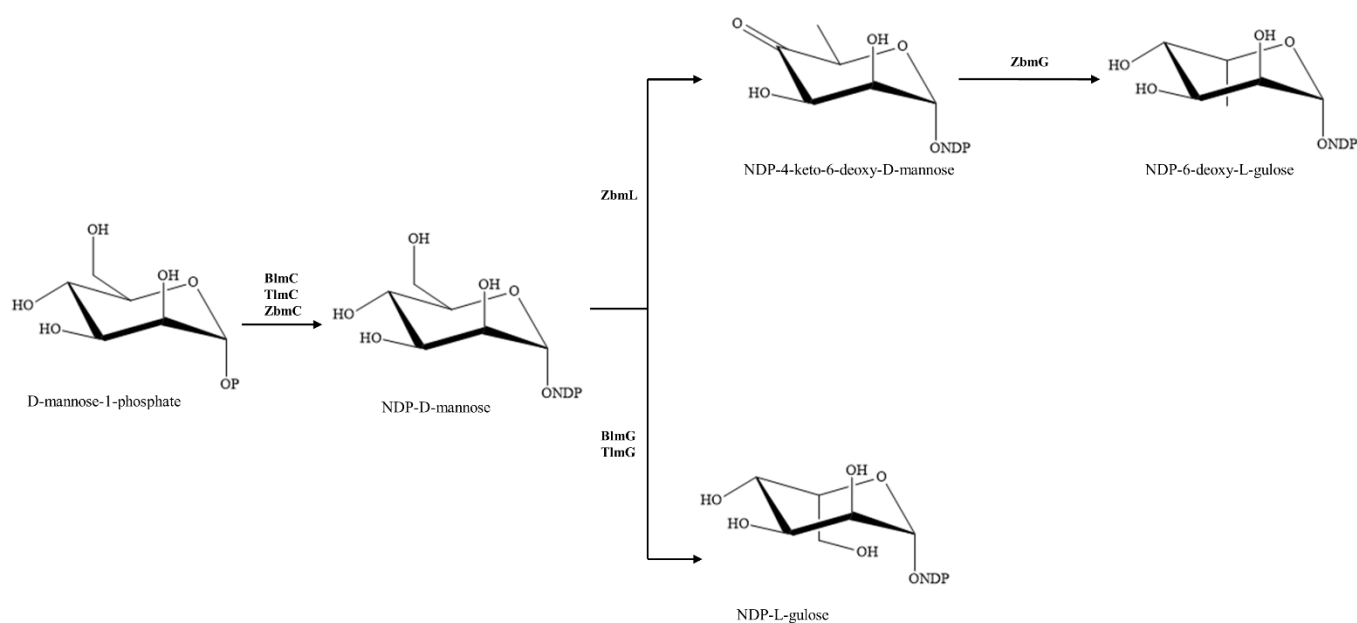

**Figure S3.** Proposed pathway for the  $\beta$ -L-6-deoxy-gulose sugar biosynthesis for the BLM, TLM and ZMB compounds.

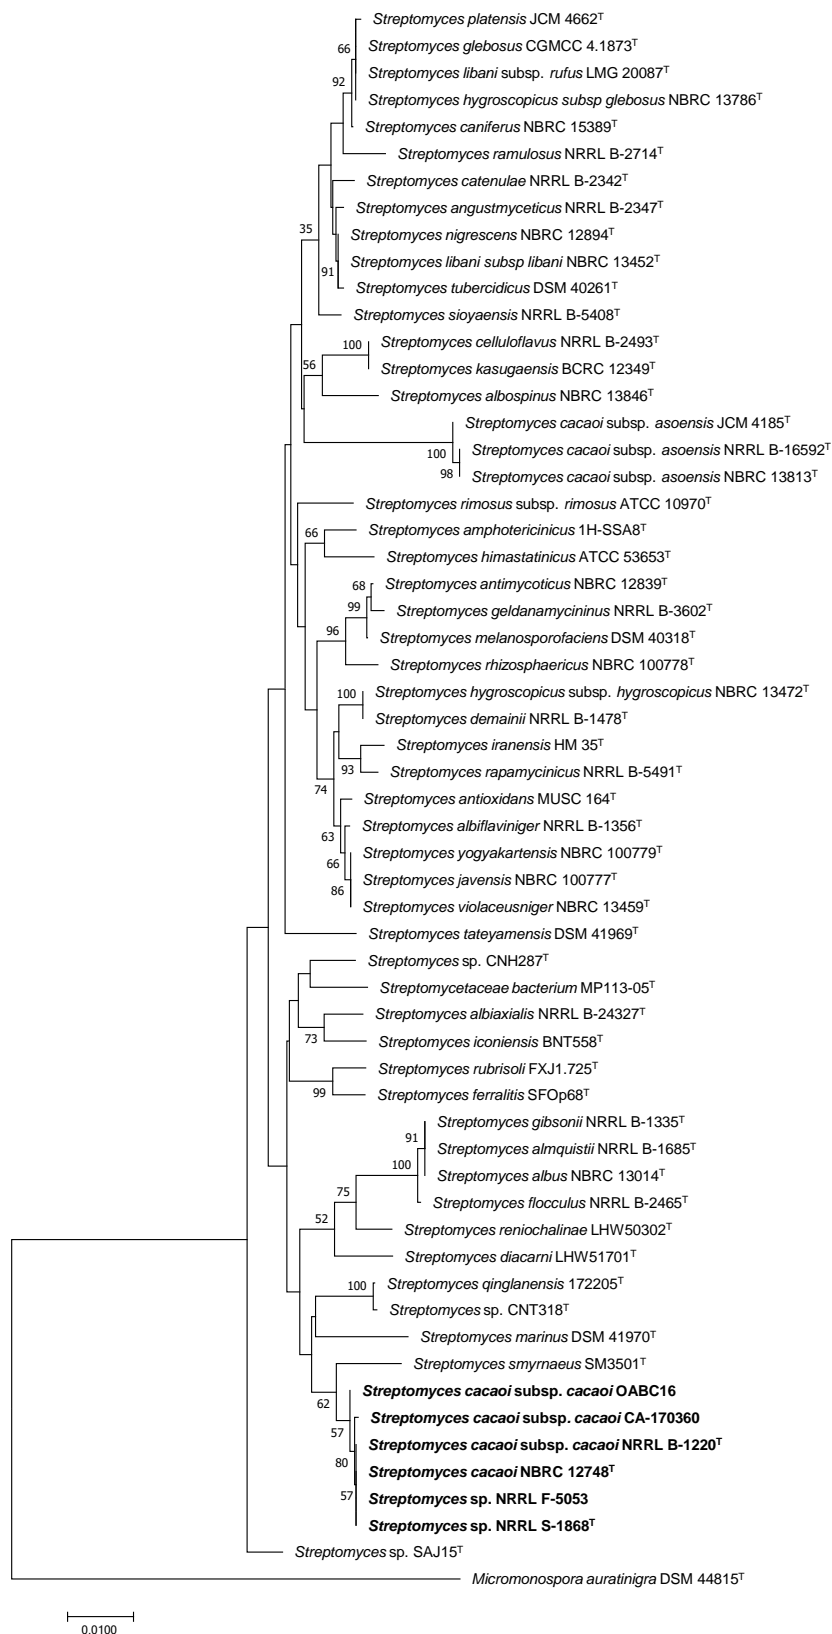

**Figure S4.** Neighbor-joining tree built with Mega X based on nearly complete 16S rRNA gene sequences of CA-170360, the 50 closest type strains of the genus *Streptomyces* and three strains of *Streptomyces cacaoi* subsp. *asoensis*. *Micromonospora auratinigra* DSM 44815 (T) was used as an outgroup. The numbers at the nodes indicate the bootstrap value (%) based on NJ analysis of 1000 replicates; only values higher than 50% are shown.
